# Supplementary material for: International experiments with different models of allocating funds to facilitate integrated care: a scoping review protocol
Source: PubMed Central journal article supplement — BMJ Open. 2018 Nov 15;8(11):e021374. doi: 10.1136/bmjopen-2017-021374 (PMC6252706; doi:10.1136/bmjopen-2017-021374), 2018-11-15
Supplement: bmjopen-2017-021374supp001.pdf [file bmjopen-2017-021374supp001.pdf]

## Appendix

**Manuscript Title:** International Experiments with Different Models of Allocating Funds to Facilitate Integrated Care: A Scoping Review Protocol

**Manuscript Type:** Scoping Review Protocol

**Table 1: Search Strategy and Terms**

|                                                                                                     |                                                                                                                                                                                                                                                                                                                                                                                                                                                                                                                                                                                                                                                                                                                                                                                         |            |                  |            |                    |            |                  |
|-----------------------------------------------------------------------------------------------------|-----------------------------------------------------------------------------------------------------------------------------------------------------------------------------------------------------------------------------------------------------------------------------------------------------------------------------------------------------------------------------------------------------------------------------------------------------------------------------------------------------------------------------------------------------------------------------------------------------------------------------------------------------------------------------------------------------------------------------------------------------------------------------------------|------------|------------------|------------|--------------------|------------|------------------|
| <b>Search Question</b>                                                                              | <b>Different Models of Allocating Funds to Facilitate Integrated Care</b>                                                                                                                                                                                                                                                                                                                                                                                                                                                                                                                                                                                                                                                                                                               |            |                  |            |                    |            |                  |
| <b>Key Concepts</b>                                                                                 | Resource Allocation, Funding, Policies, Acts, Integrated Care, Health Care, Social Care                                                                                                                                                                                                                                                                                                                                                                                                                                                                                                                                                                                                                                                                                                 |            |                  |            |                    |            |                  |
| <b>Search Strategy for Medline</b> [will be adapted for other databases]                            | ("resource allocation" OR allocate* OR "allocating fund*" OR fund* OR financ* OR pay* OR reimburs* OR purchas*). ti,ab,kw. AND (policy OR policies OR strateg* OR mechanism* OR instrument* OR "policy objective*" OR "policy action*" OR "policy instrument*" OR model). ti,ab,kw. (Act OR legislation OR law* OR bill OR rul* OR enact* OR statute). ti,ab,kw. AND ("integrated care*" OR integrat* OR coordinat* OR "care integration" OR "care coordination" OR "integration of care" OR "case management" OR "disease management" OR "collaborative care" OR "continuity of care" OR "managed care" OR "disease management"). ti,ab,kw. AND ("health sector" OR healthcare OR "health care" OR "health system" OR "social care" OR "social system" OR "social welfare"). ti,ab,kw. |            |                  |            |                    |            |                  |
| <b>Limit to:</b>                                                                                    | English language and full text and "review papers" and yr="2000 -Current"                                                                                                                                                                                                                                                                                                                                                                                                                                                                                                                                                                                                                                                                                                               |            |                  |            |                    |            |                  |
| <b>Initial Search Results in Medline Ovid</b> (search conducted on 20 <sup>th</sup> November, 2017) | 8668                                                                                                                                                                                                                                                                                                                                                                                                                                                                                                                                                                                                                                                                                                                                                                                    |            |                  |            |                    |            |                  |
| <b>Search Terms</b>                                                                                 |                                                                                                                                                                                                                                                                                                                                                                                                                                                                                                                                                                                                                                                                                                                                                                                         |            |                  |            |                    |            |                  |
|                                                                                                     | <b>Concept 1</b>                                                                                                                                                                                                                                                                                                                                                                                                                                                                                                                                                                                                                                                                                                                                                                        | <b>AND</b> | <b>Concept 2</b> | <b>AND</b> | <b>Concept 3</b>   | <b>AND</b> | <b>Concept 4</b> |
| OR                                                                                                  | "resource allocation"                                                                                                                                                                                                                                                                                                                                                                                                                                                                                                                                                                                                                                                                                                                                                                   |            | policy           |            | "integrated care*" |            | "health sector"  |
| OR                                                                                                  | allocate*                                                                                                                                                                                                                                                                                                                                                                                                                                                                                                                                                                                                                                                                                                                                                                               |            | policies         |            | integrat*          |            | healthcare       |
| OR                                                                                                  | "allocating fund*").                                                                                                                                                                                                                                                                                                                                                                                                                                                                                                                                                                                                                                                                                                                                                                    |            | strateg*         |            | coordinat*         |            | "health care"    |
| OR                                                                                                  | fund*                                                                                                                                                                                                                                                                                                                                                                                                                                                                                                                                                                                                                                                                                                                                                                                   |            | mechanism*       |            | "care integration" |            | "health system"  |

|    |           |  |                      |  |                       |  |                  |
|----|-----------|--|----------------------|--|-----------------------|--|------------------|
| OR | financ*   |  | instrument*          |  | "care coordination"   |  | "social care"    |
| OR | pay*      |  | "policy objective*"  |  | "integration of care" |  | "social system"  |
| OR | reimburs* |  | "policy action*"     |  | "case management"     |  | "social welfare" |
| OR | Purchas*  |  | "policy instrument*" |  | "disease management"  |  |                  |
| OR |           |  | model                |  | "collaborative care"  |  |                  |
| OR |           |  | Act                  |  | "continuity of care"  |  |                  |
| OR |           |  | legislation          |  | "managed care"        |  |                  |
| OR |           |  | law*                 |  | "disease management"  |  |                  |
| OR |           |  | bill                 |  |                       |  |                  |
| OR |           |  | rul*                 |  |                       |  |                  |
| OR |           |  | enact*               |  |                       |  |                  |
| OR |           |  | statute              |  |                       |  |                  |

**Table 2: Search Sources**

| <b>Databases</b>                                                  | <b>Conference Abstracts</b>                                                                         | <b>Grey Literature</b>                                                          |
|-------------------------------------------------------------------|-----------------------------------------------------------------------------------------------------|---------------------------------------------------------------------------------|
| Applied Social Sciences Index and Abstracts (ASSIA) via ProQuest  | Conference Proceedings<br>Citation Index- Science (CPCI-S) via Web of Science                       | Dissertations & Theses A&I via ProQuest                                         |
| EMBASE via Ovid SP [Excluding MEDLINE]                            | Conference Proceedings<br>Citation Index- Social Science & Humanities (CPCI-SSH) via Web of Science | ISI Proceedings                                                                 |
| International Bibliography of the Social Sciences via ProQuest    |                                                                                                     | Joanna Briggs Institute EBP Database                                            |
| McMaster Health Forum - Health System Evidence                    |                                                                                                     | Google                                                                          |
| MEDLINE via Ovid                                                  |                                                                                                     | Google Scholar                                                                  |
| PubMed [Excluding MEDLINE]                                        |                                                                                                     | OpenGrey                                                                        |
| Health Management Information Consortium (HMIC)                   |                                                                                                     | PAIS Index - Public Affairs Information Service                                 |
| Science Citation Index Expanded (SCI-EXPANDED) via Web of Science |                                                                                                     | Website of WHO, WHO Europe, International Foundation for Integrated Care (IFIC) |
| EconLit                                                           |                                                                                                     | European Observatory on Health Systems and Policies                             |
| Social Science Citation Index (SSRN)                              |                                                                                                     | Agency for Healthcare Research and Quality (AHRQ)                               |
| Social Sciences Citation Index (SSCI) via Web of Science          |                                                                                                     | National Institute for Health and Care Excellence (NICE)                        |
| Social Services Abstracts via ProQuest                            |                                                                                                     | National Institutes for Health (NIH)                                            |
| Sociological Abstracts via ProQuest                               |                                                                                                     | Canadian Institutes for Health Research (CIHR)                                  |
| Informit Health Collection                                        |                                                                                                     |                                                                                 |
| International Bibliography of Social Sciences                     |                                                                                                     |                                                                                 |
| Cumulative Index to Nursing and Allied Health Literature (CINAHL) |                                                                                                     |                                                                                 |
| PsycINFO                                                          |                                                                                                     |                                                                                 |
| Scopus                                                            |                                                                                                     |                                                                                 |
| Cochrane Library                                                  |                                                                                                     |                                                                                 |

**Table 3: Dissemination of Findings**

| <b>Intended Audience</b>           | <b>Dissemination Tools/Means</b>                                                                                                                  |
|------------------------------------|---------------------------------------------------------------------------------------------------------------------------------------------------|
| Federal and provincial governments | Synthesis report, conceptual framework of models of allocating funds to facilitate integrated care, policy briefs, blogs, YouTube videos, webinar |
| Policy makers in other countries   | Conceptual framework and policy briefs available online for free as an evidence repository, blogs, YouTube videos, webinar                        |
| Research community                 | Peer-reviewed articles and conference presentations, blogs, YouTube videos, webinar                                                               |
| General public                     | Media engagement through publication of newspapers and magazine articles, and press releases (e.g. media interviews), YouTube videos              |

**Table 4: Research Project Timeline**

| <b>Research Activities</b>                                                                  | <b>Prior to Project Start Date</b> | <b>Q1</b> | <b>Q2</b> | <b>Q3</b> | <b>Q4</b> |
|---------------------------------------------------------------------------------------------|------------------------------------|-----------|-----------|-----------|-----------|
| Consultation with the knowledge users (KUs) on the research questions and research proposal | X                                  |           |           |           |           |
| Consulting KUs to refine the research questions                                             | X                                  | X         |           |           |           |
| Confirming search strategy with information scientist                                       |                                    | X         |           |           |           |
| Conducting search in multiple search sources                                                |                                    | X         | X         |           |           |
| Identifying relevant studies                                                                |                                    | X         | X         |           |           |
| Relevance testing by identifying inclusion and exclusion criteria                           |                                    |           | X         |           |           |
| Entry of Data into NVivo10                                                                  |                                    |           | X         |           |           |
| Cross-check exercise to ensure consistency of literature review by team members             |                                    |           | X         |           |           |
| Extracting data from included studies (charting the data)                                   |                                    |           | X         |           |           |
| Data analysis, synthesis, consultation with KUs through holding workshop with KUs           |                                    |           |           | X         |           |
| Develop conceptual framework to classify informal network policies with input from KUs      |                                    |           |           | X         |           |
| Drafting review findings report                                                             |                                    |           |           |           | X         |
| Drafting policy briefs                                                                      |                                    |           |           |           | X         |
| Submission to peer-reviewed journals                                                        |                                    |           |           |           | X         |
| Presenting findings at relevant conferences                                                 |                                    |           |           |           | X         |
